# Supplementary material for: Analysis of genomic and characterization features of Luteolibacter soli sp. nov., isolated from soil
Source: PubMed Central journal article supplement (PMC11427321; doi:10.3389/fmicb.2024.1483195), 2024-09-13
Supplement: Image_1.pdf [file Image_1.pdf]

## Supplementary Material

### **Analysis of genomic and characterization features of *Luteolibacter soli* sp. nov., isolated from soil**

Jing An<sup>1</sup>, Xiaoqi Xuan<sup>1</sup>, Yanan Wang<sup>1</sup>, Linwei Wu<sup>2,3</sup>, Jizhong Zhou<sup>3,4,5,6\*</sup> and Dashuai Mu<sup>1,3,7,8\*</sup>

<sup>1</sup> Marine College, Shandong University, Weihai, Shandong, China.

<sup>2</sup> Institute of Ecology, Key Laboratory for Earth Surface Processes of the Ministry of Education, College of Urban and Environmental Sciences, Peking University, Beijing, China.

<sup>3</sup> Department of Microbiology and Plant Biology, University of Oklahoma, Norman, OK, USA.

<sup>4</sup> Institute for Environmental Genomics, University of Oklahoma, Norman, OK, USA

<sup>5</sup> Department of Microbiology and Plant Biology, University of Oklahoma, Norman, OK, USA.

<sup>6</sup> State Key Joint Laboratory of Environment Simulation and Pollution Control, School of Environment, Tsinghua University, Beijing, China.

<sup>7</sup> School of Civil Engineering and Environmental Sciences, University of Oklahoma, Norman, OK, USA.

<sup>8</sup> School Key Laboratory of Microbial Technology, Shandong University, Qingdao, Shandong, China.

<sup>9</sup> Weihai Research Institute of Industrial Technology of Shandong University, Weihai, China.

#### **\*Correspondence:**

Da-Shuai Mu, Email: [dashuai.mu@sdu.edu.cn](mailto:dashuai.mu@sdu.edu.cn)

Ji-Zhong Zhou, Email: [jzhou@ou.edu](mailto:jzhou@ou.edu)

**Figure S1.** Scanning electron micrograph of strain Y139<sup>T</sup> after growing on R2A plates at 30°C for 2 days. Bar: 4 μm.

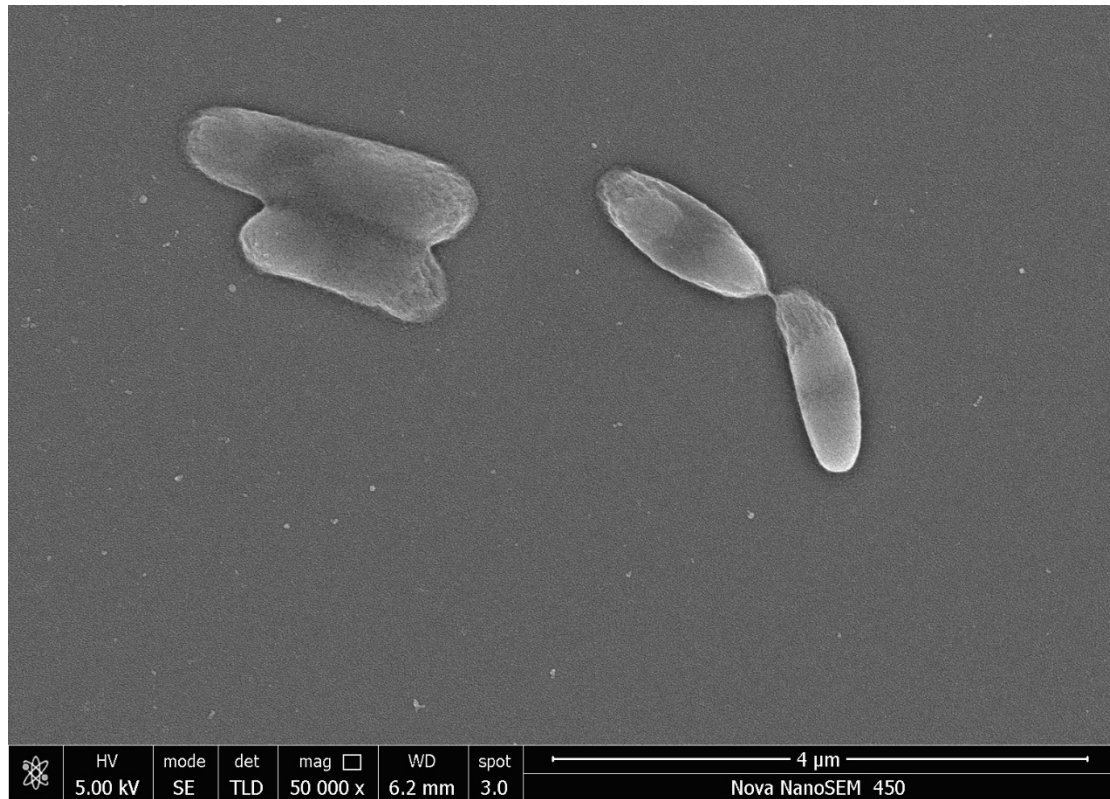

**Figure S2.** Two-dimensional TLC plate images of polar lipids of strain Y139<sup>T</sup> (A); *L.arcticus* CCTCC AB 2014275<sup>T</sup> (B); *L.flavescens* MCCC 1K03193<sup>T</sup> (C); *L.pohnpeiensis* CCTCC AB 2011006<sup>T</sup> (D).

Abbreviation: PE, phosphatidylethanolamine; PG, phosphatidylglycerol; PME, phosphatidylmethylethanolamine; DPG, diphosphatidylglycerol; GL, (unidentified) glycolipid; L, unidentified lipids.

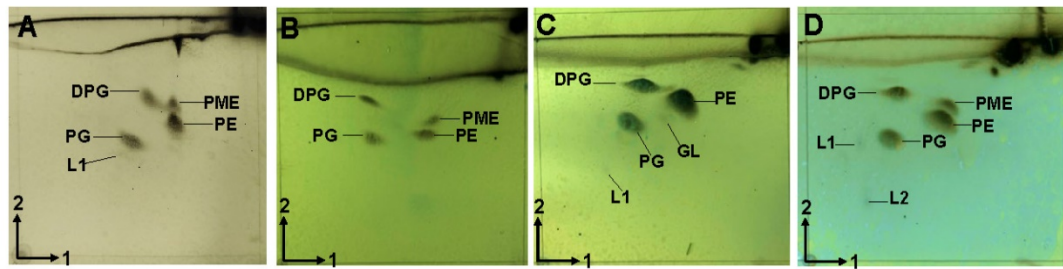

**Figure S3.** The secondary metabolite biosynthetic gene clusters of all strains in the genus *Luteolibacter*. Solid circles and hollow circles represent the presence or absence of the metabolite, respectively.

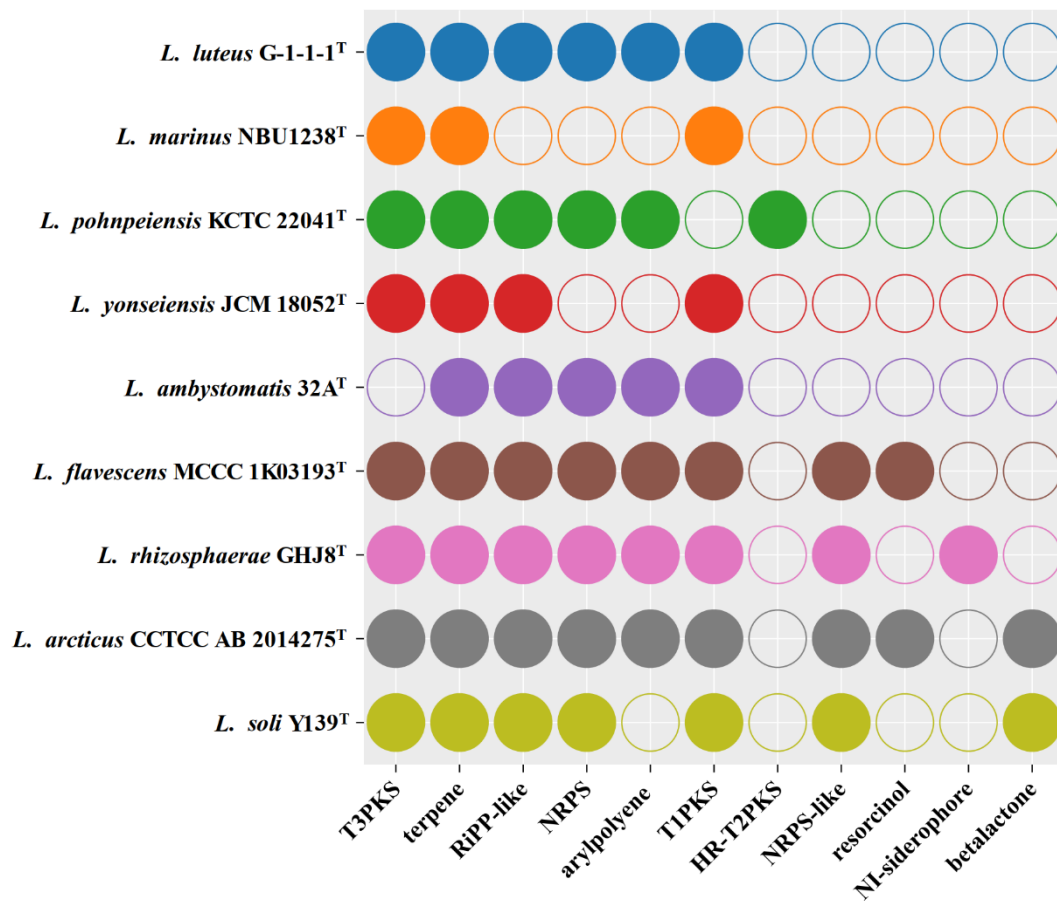

**Figure S4.** Genome analysis of the genus *Luteolibacter* (9 genomes). (A) Venn diagram displaying the numbers of core gene families and unique genes for each *Luteolibacter* strain. (B) Percentage of core, accessory, and unique genes in each genome.

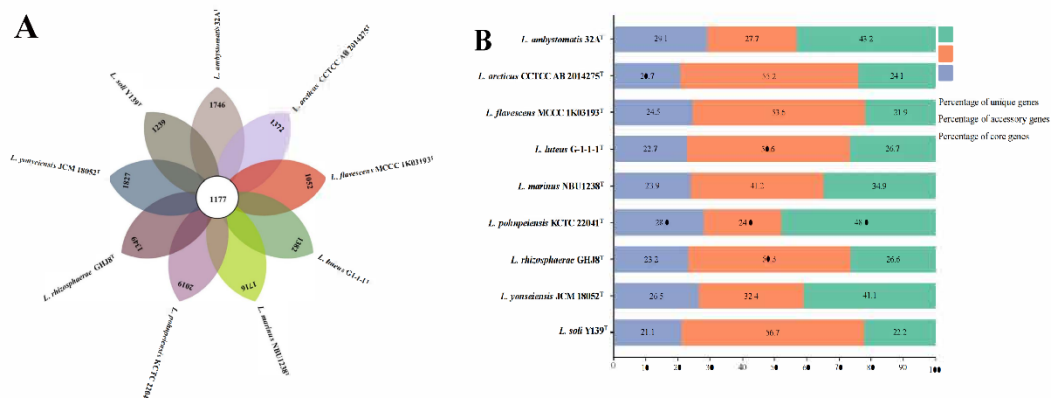

**Figure S5:** The distribution of core genes, accessory genes and unique genes to different metabolic pathways in the genus *Luteolibacter*.

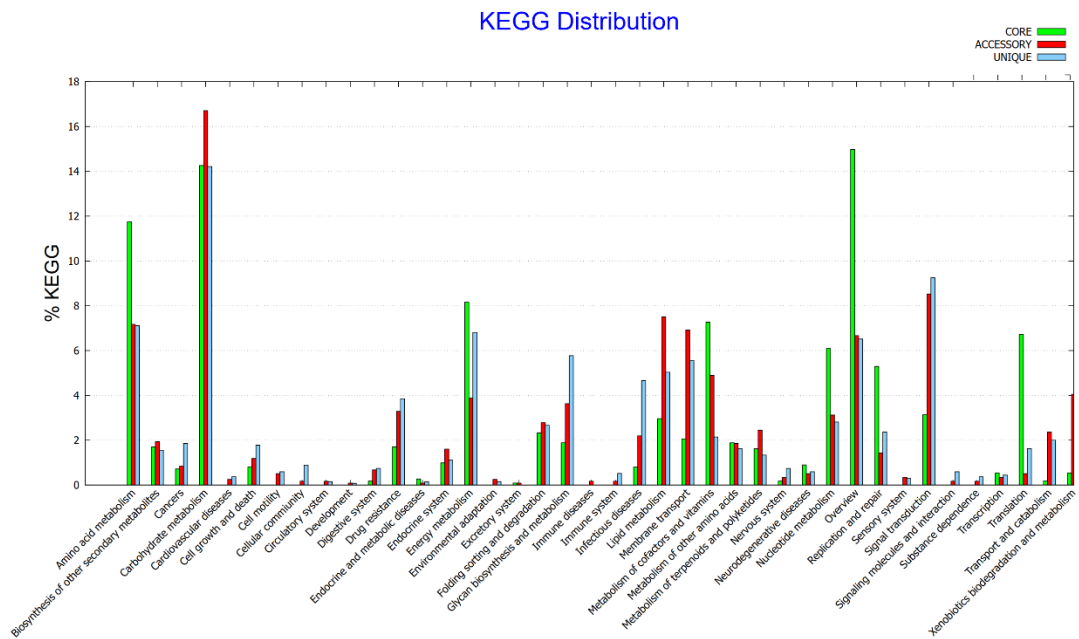

**Figure S6: Genes associated with subsystems and their distribution across various categories of strain Y139<sup>T</sup>.**

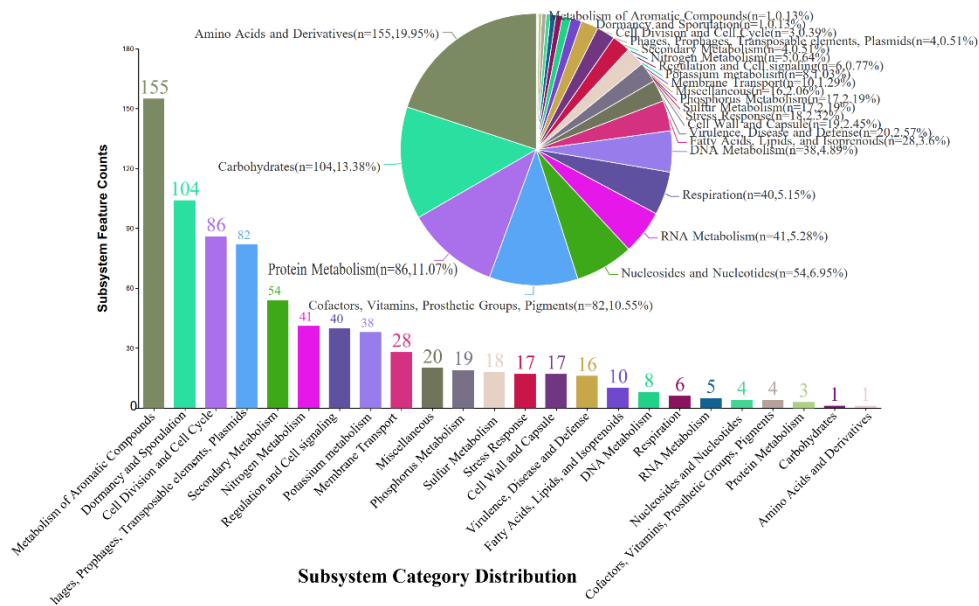

**Table S1.** Genomic dataset of Y139<sup>T</sup> and other strains of genus *Luteolibacter* analyzed in the pan-genome analysis.

| Strain                                              | Genome size (Mb) | Number of scaffolds | Completeness (%) | G+C content (%) | Genes | Protein-coding gene | Pseudogene | RNA gene | GenBank             |
|-----------------------------------------------------|------------------|---------------------|------------------|-----------------|-------|---------------------|------------|----------|---------------------|
| <i>L. ambystomatis</i> 32A <sup>T</sup>             | 5.3              | 1                   | 99.1             | 62.0            | 4178  | 4112                | 7          | 59       | GCA_0181379<br>65.1 |
| <i>L. arcticus</i> CCTCC AB 2014275 <sup>T</sup> .  | 7.5              | 43                  | 98.5             | 63.0            | 5848  | 5756                | 31         | 61       | GCA_0259502<br>35.1 |
| <i>L. flavescens</i> MCCC 1K03193 <sup>T</sup>      | 5.9              | 73                  | 98.0             | 64.0            | 4911  | 4836                | 21         | 54       | GCA_0259500<br>85.1 |
| <i>L. luteus</i> G-1-1-1 <sup>T</sup>               | 6.4              | 1                   | 98.9             | 61.0            | 5268  | 5176                | 32         | 60       | GCA_0129134<br>85.1 |
| <i>L. marinus</i> NBU1238 <sup>T</sup>              | 6.2              | 355                 | 96.4             | 65.0            | 5053  | 4889                | 103        | 61       | GCA_0149047<br>55.1 |
| <i>L. pohpeiensis</i> CCTCC AB 2011006 <sup>T</sup> | 4.7              | 254                 | 97.5             | 53.5            | 4251  | 4180                | 16         | 54       | GCA_0165954<br>35.1 |
| <i>L. rhizosphaerae</i> GHJ8 <sup>T</sup>           | 6.2              | 33                  | 99.0             | 62.5            | 5267  | 5194                | 18         | 55       | GCA_0259500<br>95.1 |
| <i>L. yonseiensis</i> JCM 18052 <sup>T</sup>        | 5.7              | 13                  | 98.6             | 60.5            | 4581  | 4499                | 9          | 73       | GCA_0165954<br>65.1 |
| <i>L. soli</i> Y139 <sup>T</sup>                    | 7.1              | 31                  | 98.9             | 62.5            | 5715  | 5651                | 5          | 59       | GCA_0380667<br>15.1 |
